# Supplementary material
Source: publisher figshare collection journal article supplement (https://acs.figshare.com/ndownloader/files/4486969)
Supplement: Supplementary file 1 [file 4486969]

Novel synthesis and structural characterization of a high affinity  
paramagnetic kinase probe for the identification of non-ATP site binders by  
NMR

*Franklin J. Moy<sup>†</sup>, Arthur Lee<sup>‡</sup>, Lori Krim Gavrin<sup>‡</sup>, Zhang Bao Xu<sup>†</sup>, Annette Sievers<sup>†</sup>,  
Elizabeth Kieras<sup>†</sup>, Wayne Stochaj<sup>†</sup>, Lidia Mosyak<sup>†</sup>, John McKew<sup>‡</sup>, and Désirée H. H.  
Tsao<sup>†\*</sup>*

<sup>†</sup>Structural Biology and Computational Chemistry and <sup>‡</sup>Chemical Sciences, Wyeth  
Research, 200 CambridgePark Drive, Cambridge, MA, 02140.

---

\* To whom correspondence should be addressed: 200 CambridgePark Drive, Cambridge,  
MA 02140. Phone: 617-665-5667, Fax: 617-665-5682, Email: [dtsao@wyeth.com](mailto:dtsao@wyeth.com).

*Purity of Final Compounds*

| <b>Compound Number</b> | <b>Condition 1 HPLC % purity</b> | <b>Condition 2 HPLC % purity</b> |
|------------------------|----------------------------------|----------------------------------|
| <b>17</b>              | 100                              | 100                              |
| <b>18</b>              | 100                              | 100                              |
| <b>18b</b>             | 100                              | 100                              |
| <b>19</b>              | 97.0                             | 99.0                             |
| <b>20</b>              | 100                              | 100                              |
| <b>21</b>              | 100                              | 100                              |
| <b>22</b>              | 98.5                             | 99.2                             |
| <b>23</b>              | 98.5                             | 99.0                             |
| <b>1</b>               | 98.8                             | 100                              |
| <b>3</b>               | 98.7                             | 98.7                             |

Purity in two solvent systems (H<sub>2</sub>O-CH<sub>3</sub>CN and H<sub>2</sub>O-MeOH) was determined using a HPLC (Agilent 1100, Agilent, Waldbronn, Germany) under the following conditions: UV-DAD; Agilent Zorbax SB-C18 column 3 μm, 2.1 x 30 mm ; Condition 1: solvent A, H<sub>2</sub>O with 0.1% formic acid; solvent B, acetonitrile with 0.1% formic acid; gradient, 0-7 min, from 95% A and 5% B to 0% A and 100% B; 7-9 min 0% A and 100% B; Condition 2: solvent A, H<sub>2</sub>O with 0.1% formic acid; solvent B, methanol with 0.1% formic acid; gradient, 0-7 min, from 95% A and 5% B to 0% A and 100% B; 7-9 min 0% A and 100%; B flow rate, 0.8 mL/min, temperature, 40 °C, pressure 18.0 MPa ± 0.1.

## Simulation of nuclear relaxation rates vs distance away from the nitroxide

$$R_{1M} = \frac{2}{15} \left( \frac{\mu_o}{4\pi} \right)^2 \frac{\gamma_I^2 g_e^2 \mu_B^2 S(S+1)}{r^6} \left[ \frac{7\tau_c}{1+\omega_S^2 \tau_c^2} + \frac{3\tau_c}{1+\omega_I^2 \tau_c^2} \right] + \frac{2}{5} \left( \frac{\mu_o}{4\pi} \right)^2 \frac{\omega_I^2 g_e^4 \mu_B^4 S^2 (S+1)^2}{(3kT)^2 r^6} \left[ \frac{3\tau_{Curie}}{1+\omega_I^2 \tau_{Curie}^2} \right] \quad (1)$$

$$R_{2M} = \frac{1}{15} \left( \frac{\mu_o}{4\pi} \right)^2 \frac{\gamma_I^2 g_e^2 \mu_B^2 S(S+1)}{r^6} \left[ 4\tau_c + \frac{13\tau_c}{1+\omega_S^2 \tau_c^2} + \frac{3\tau_c}{1+\omega_I^2 \tau_c^2} \right] + \frac{1}{5} \left( \frac{\mu_o}{4\pi} \right)^2 \frac{\omega_I^2 g_e^4 \mu_B^4 S^2 (S+1)^2}{(3kT)^2 r^6} \left[ 4\tau_{curie} + \frac{3\tau_{Curie}}{1+\omega_I^2 \tau_{Curie}^2} \right] \quad (2)$$

$$\tau_c^{-1} = \tau_s^{-1} + \tau_r^{-1} + \tau_M^{-1} \quad (3)$$

$$\tau_{Curie}^{-1} = \tau_r^{-1} + \tau_M^{-1} \quad (4)$$

Physical constants:

$$\mu_o = 4\pi \times 10^{-7} \text{ kg m s}^{-2} \text{ A}^{-2}; \gamma_I = 2.6752 \times 10^8 \text{ rad s}^{-1} \text{ T}^{-1}; g_e = 2.0023;$$

$$\mu_B = 9.2740 \times 10^{-24} \text{ J T}^{-1}; k = 1.3807 \times 10^{-23} \text{ J K}^{-1};$$

Parameters used in simulation:

$$S = 1/2; \tau_s = 1 \times 10^{-7} \text{ s}; \tau_r = 15 \times 10^{-9} \text{ s for kinase catalytic domain};$$

$$\tau_r = 25 \times 10^{-9} \text{ s for full length kinase, } \tau_s = 1 \times 10^{-7} \text{ s}; \tau_r \ll \tau_M; \tau_s \ll \tau_M;$$

$$\omega_I = 2\pi \times 600 \times 10^6 \text{ Hz}; \omega_S = 658 \times \omega_I, T = 298 \text{ kelvin};$$

|            | $\tau_r=15\text{ns}$ for kinase catalytic domain |                  |                |                |
|------------|--------------------------------------------------|------------------|----------------|----------------|
| r (meters) | R1M dipolar (Hz)                                 | R2M dipolar (Hz) | R1M curie (Hz) | R2M curie (Hz) |
| 5.00E-10   | 25.49                                            | 41113.00         | 0.02           | 47.68          |
| 6.00E-10   | 8.54                                             | 13768.00         | 0.01           | 15.97          |
| 7.00E-10   | 3.39                                             | 5460.00          | 0.00           | 6.33           |
| 8.00E-10   | 1.52                                             | 2450.00          | 0.00           | 2.84           |
| 1.00E-09   | 0.40                                             | 642.00           | 0.00           | 0.74           |
| 1.50E-09   | 0.03                                             | 56.40            | 0.00           | 0.07           |
| 2.00E-09   | 0.01                                             | 10.04            | 0.00           | 0.01           |
| 2.50E-09   | 0.00                                             | 2.63             | 0.00           | 0.00           |
|            |                                                  |                  |                |                |
|            |                                                  |                  |                |                |
|            | $\tau_r=25\text{ns}$ for full length kinase      |                  |                |                |
| r (meters) | R1M dipolar (Hz)                                 | R2M dipolar (Hz) | R1M curie (Hz) | R2M curie (Hz) |
| 5.00E-10   | 16.63                                            | 63029.00         | 0.01           | 79.45          |
| 6.00E-10   | 5.57                                             | 21108.00         | 0.00           | 26.61          |
| 7.00E-10   | 2.21                                             | 8370.00          | 0.00           | 10.55          |
| 8.00E-10   | 0.99                                             | 3756.00          | 0.00           | 4.74           |
| 1.00E-09   | 0.26                                             | 985.00           | 0.00           | 1.24           |
| 1.50E-09   | 0.02                                             | 86.46            | 0.00           | 0.11           |
| 2.00E-09   | 0.00                                             | 15.39            | 0.00           | 0.02           |
| 2.50E-09   | 0.00                                             | 4.03             | 0.00           | 0.01           |

Equations (1) and (2) are the relaxation rates  $R_{1M}$  and  $R_{2M}$  contributed by the unpaired electron from the nitroxide.<sup>1</sup> The first and second terms of equations (1) and (2) are the dipolar and Curie contributions, respectively. Equations (3) and (4) are the correlation times for the dipolar and Curie relaxation contributions, respectively. The parameters used in the simulation are  $S = 1/2$  (electron spin quantum number),  $\tau_s = 1 \times 10^{-7}$  sec (electron relaxation time),<sup>2</sup>  $\omega_I =$  angular frequency on 600 MHz spectrometer and  $T = 298$  kelvin. The dipolar and Curie part of the relaxation rates  $R_{1M}$  and  $R_{2M}$  were simulated for two  $\tau_r$  (rotational correlation time) times,<sup>3</sup> 15 ns (for kinase catalytic domain) and 25 ns (for full length kinase) with  $\tau_M$  (chemical exchange) larger than both  $\tau_s$  and  $\tau_r$ . With these parameters, only  $R_{2M}$  dipolar measurements will give quantitative distance information. Data here shows that from 5 to 15 Å away the  $R_{2M}$  dipolar measurements are greater than 56 Hz and 86 Hz for 15 ns and 25 ns  $\tau_r$ , respectively. With a ligand in fast exchange and assuming a fraction bound of at least 10%, the PRE at 15 Å will contribute 5.6 Hz and 8.6 Hz (for 15 ns and 25 ns  $\tau_r$ ) to the  $R_{2\text{obs}}$  ( $R_2$  observe), which may give quantitative distance measurements. Above 15 Å, the quantitative distance measurements become difficult due to smaller PRE, accuracy in measurements, and the  $1/r^6$  dependence with relaxation rates. 25 Å (for a  $\tau_r$  of 25 ns) away is about the limit of detection of ligand binding with a PRE of 0.4 Hz contribution to  $R_{2\text{obs}}$  at 10% bound.

1. Arnesano, F.; Banci, L.; Piccioli, M., NMR structures of paramagnetic metalloproteins. *Quarterly Reviews of Biophysics* **2006**, 38, 167-219.
2. Alecci, M.; Lurie, D. J.; Sotgiu, A., Measurement of longitudinal relaxation times of free radicals by low field pulsed dynamic nuclear polarization. *Proc. Intl. Soc. Mag. Reson. Med.* **2001**, 9, 935.
3. Lee, D.; Hilty, C.; Wider, G.; Wuthrich, K., Effective rotational correlation times of proteins from NMR relaxation interference. *J. Magn. Reson.* **2006**, 178, 72-76.
